# Supplementary material
Source: PubMed Central journal article supplement (PMC3118738)

1 Online Figure 1  
2 Cui et al.

3

4

5

6

7

8

9

10

11

12

13

14

15

16 **Online Figure 1.** Selective extracellular acidification caused a reduction in  $R_m$  (A) and  
17 depolarization (B). **C,D.** Similar effects were produced by selective intracellular acidification with  
18  $pH_o$  7.0 (\*,  $P < 0.05$ ; \*\*,  $P < 0.01$ ).

19

20

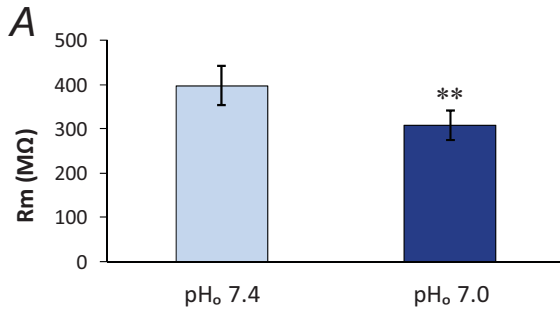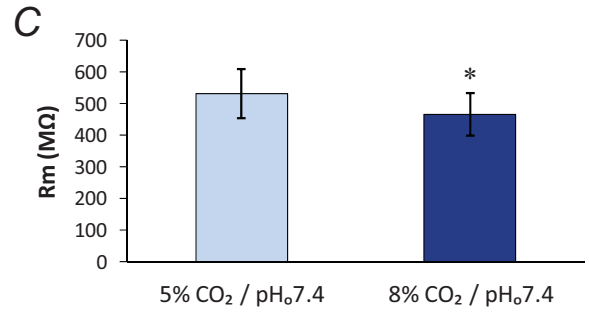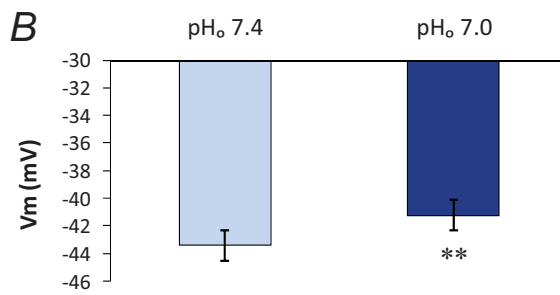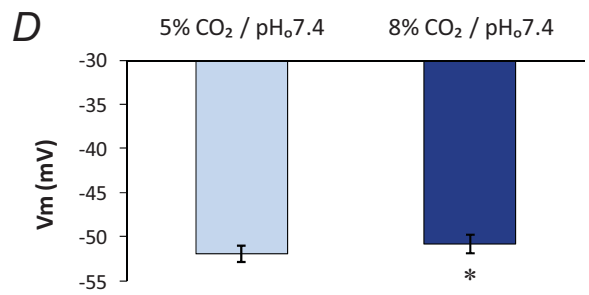

23  
24

25

26

27

28

29

30

31

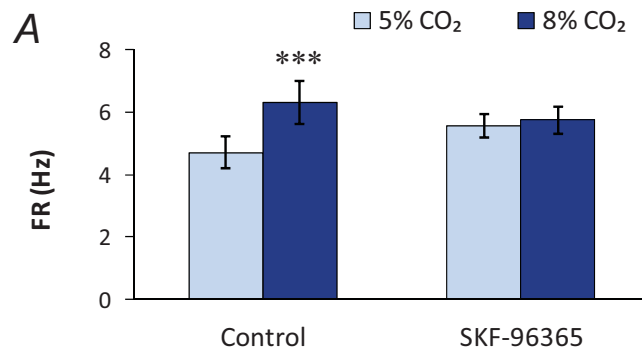

32

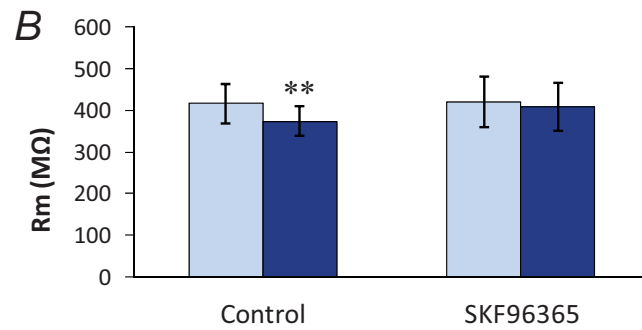

33

34

35

36

37

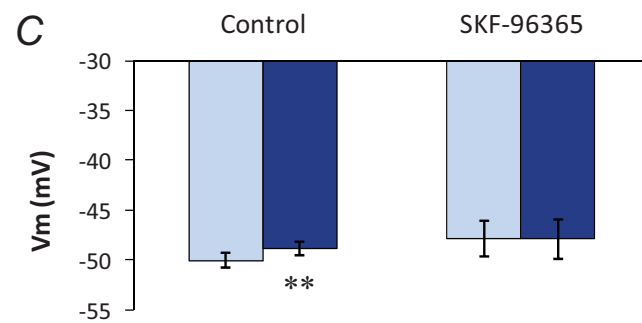

38

39

40

41

42

43

44 **Online Figure 2.** LC neuronal responses to hypercapnia after synaptic blockade. The high CO<sub>2</sub>  
45 exposure remained to produce significant changes in FR, RM and Vm (n=7 cells; \*\*, P<0.01; \*\*\*,  
46 P<0.001). Such changes were abolished in the presence of 50μM SKF-86365 (n=4 cells). Data  
47 are presented as means ± s.e.

48 Online Figure 3  
49 Cui et al.

50

51

52

53

54

55

56

57

58

59

60

61

62

63

64

65

66

67

68 **Online Figure 3.** The effect of BAPTA on the CO<sub>2</sub> response of LC neurons. Although an  
69 exposure to 8%CO<sub>2</sub> still augmented firing activity with 10 mM BAPTA in the pipette solution, the  
70 firing rate changes were significantly reduced in comparison with the cell response in the  
71 absence of BAPTA (\*, P<0.05; \*\*\*, P<0.001; data are presented as means ± s.e, n=8 cells)

72

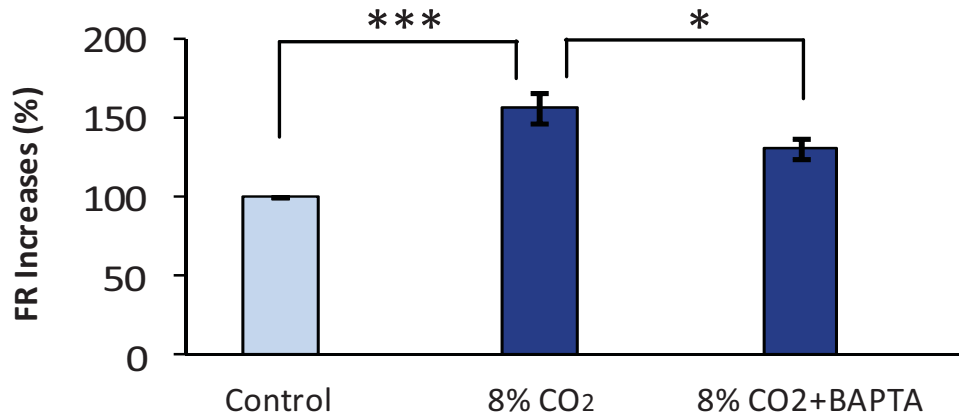

Supplement: supp_00759.2010_suppmat.pdf [file supp_00759.2010_suppmat.pdf]
